# Supplementary material
Source: PubMed Central journal article supplement (PMC3742551)
Supplement: NIHMS480775-supplement-1.pdf [file NIHMS480775-supplement-1.pdf]

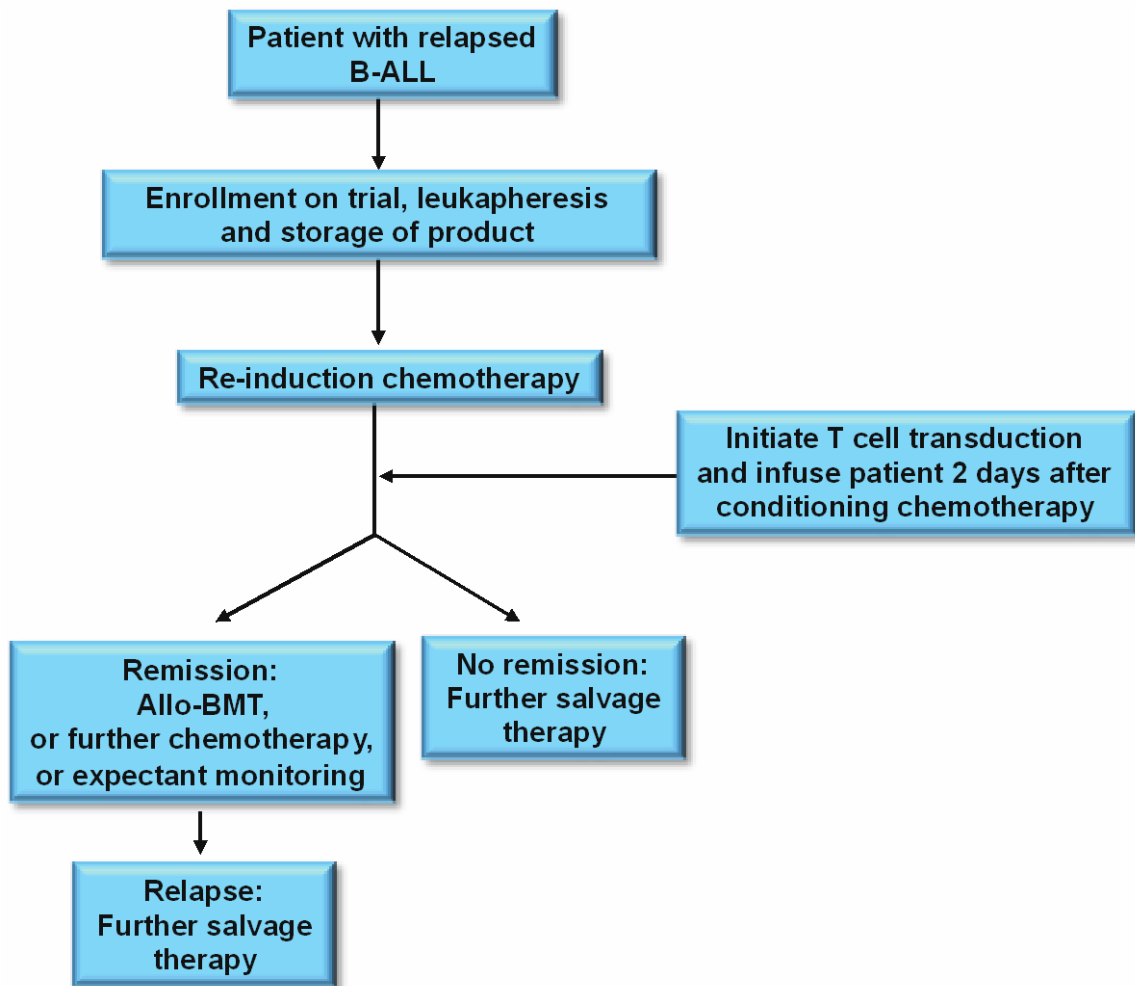

**Figure S1.** Trial schema for adult patients with relapsed B-ALL.

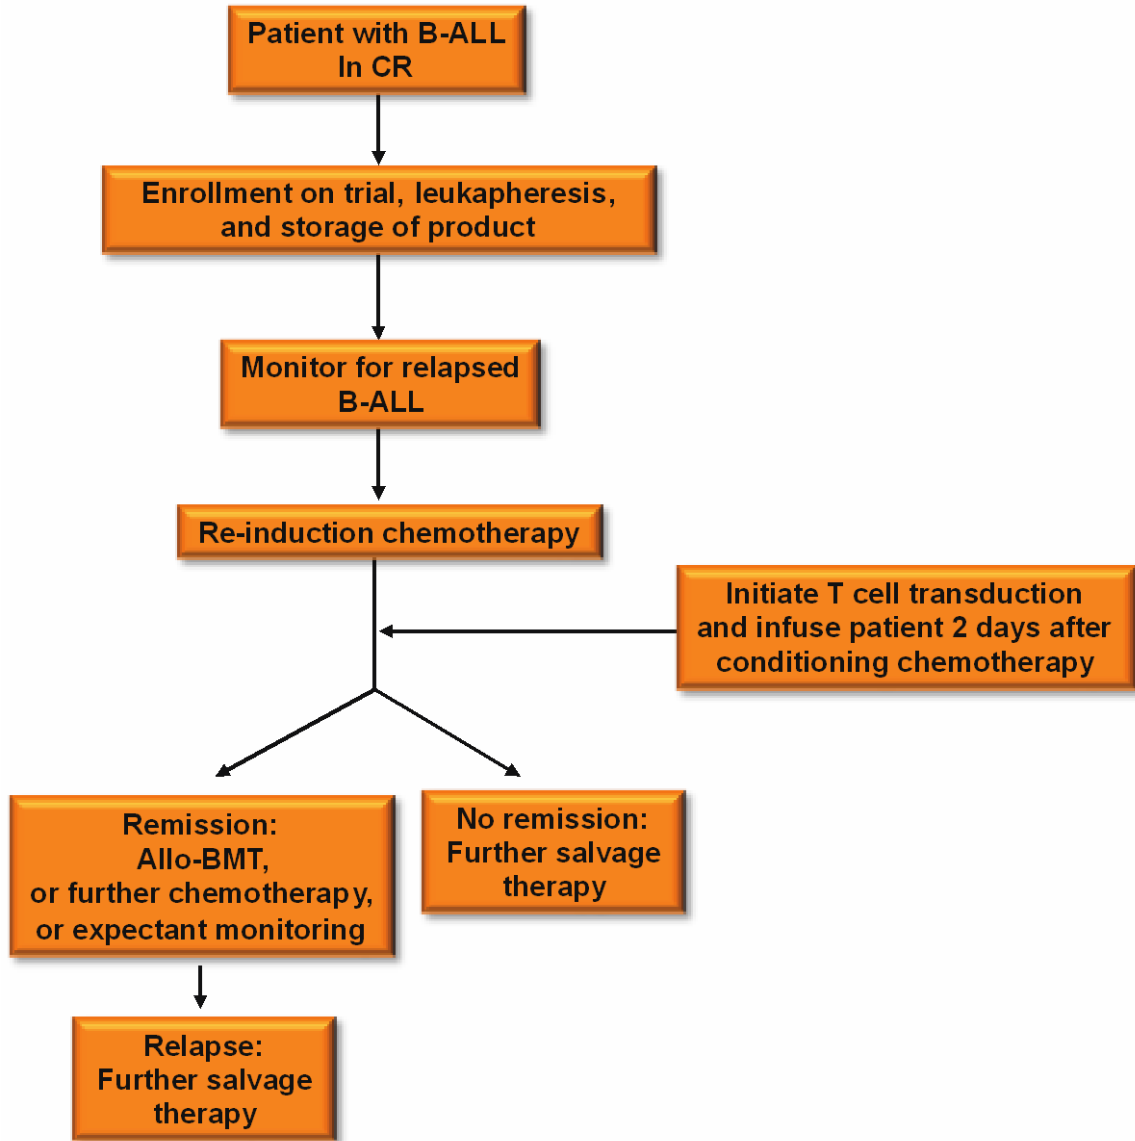

**Figure S2.** Trial schema for adult patients with B-ALL in CR.

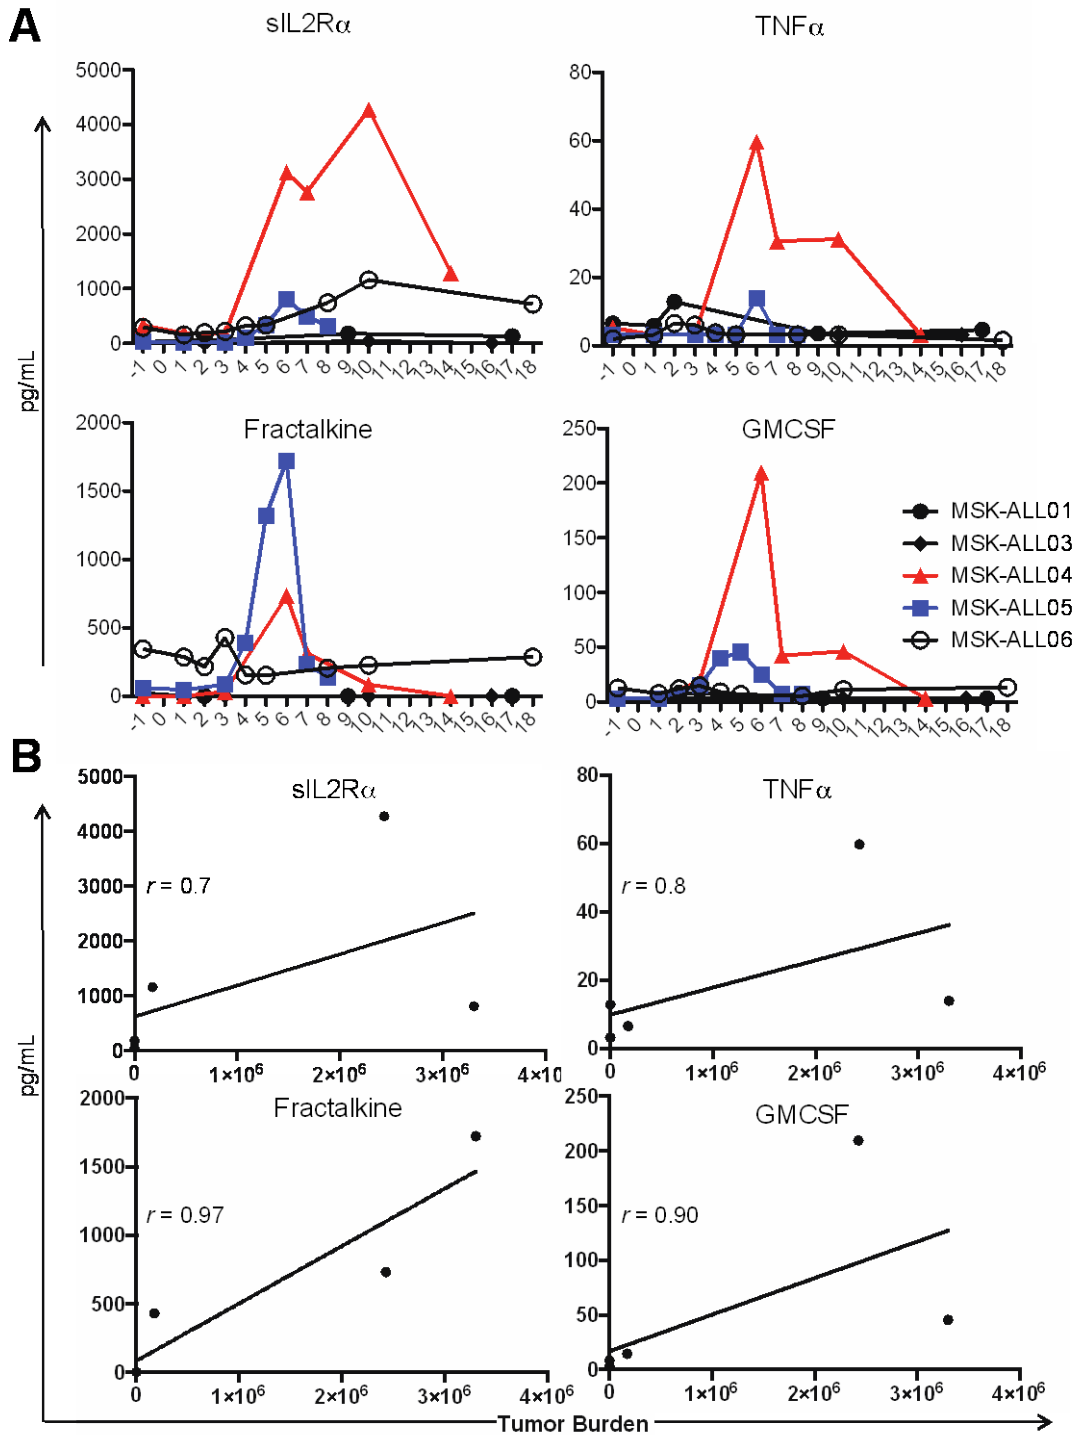

**Figure S3. Serum cytokine detection and correlation with tumor burden.** A. Pre- and post-treatment serum samples from all patients were evaluated for another four cytokines (pg/mL). Samples range from pre-cyclophosphamide (listed as Day -1) to Day 18, with Days 1 and 2 being time points for infusion with the 19-28z CAR+ T cells. B. In addition, Spearman rank correlation coefficients ( $r$ ) for the cytokines and tumor burden, calculated as in Figure 2, are noted on the plots.

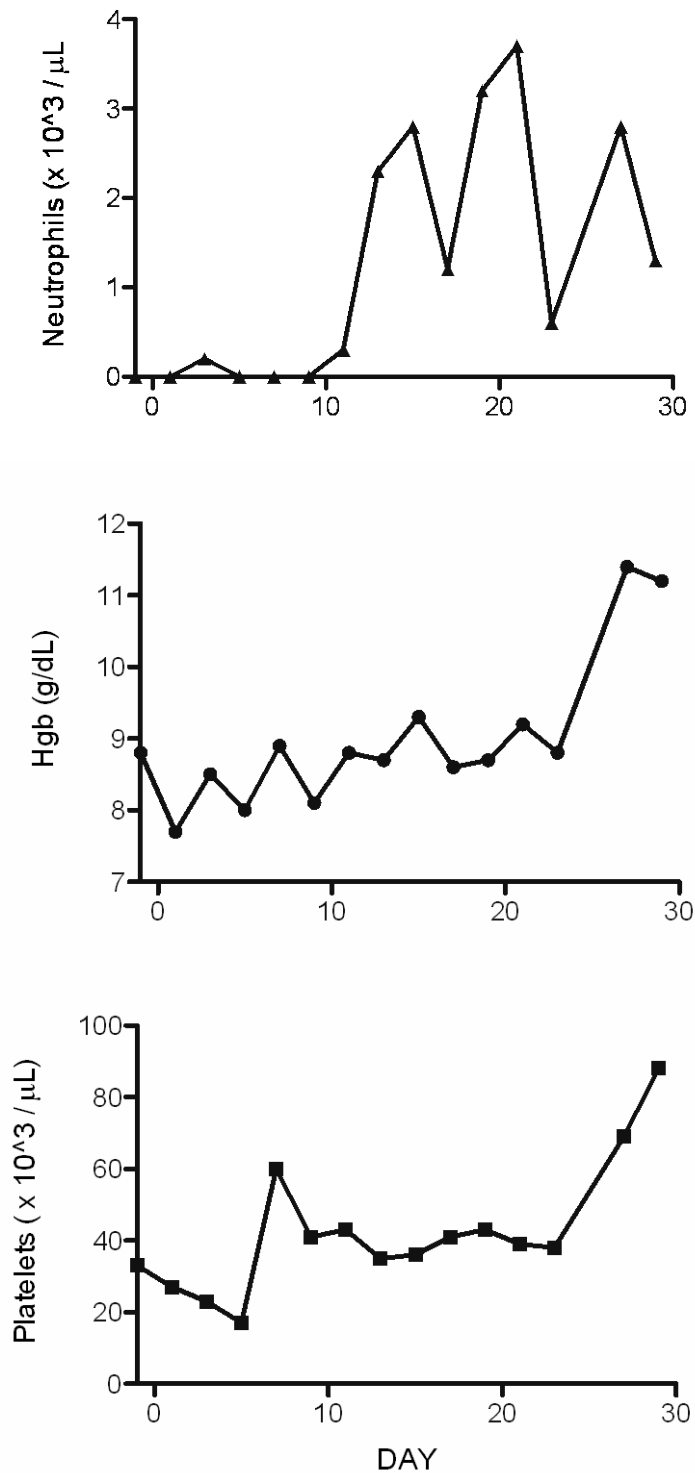

**Figure S4. Rapid hematopoietic recovery in MSK-ALL05 after infusion with 19-28z T cells.** The absolute neutrophil count (top panel), hemoglobin (Hgb, middle panel), and platelets (bottom panel) calculated from daily complete blood counts are noted from the Day of cyclophosphamide treatment (-1) to 30 days after 19-28z T cell infusion.

| Test/Patient ID                                                         | MSK-ALL01            | MSK-ALL03            | MSK-ALL04            | MSK-ALL05            | MSK-ALL06            |
|-------------------------------------------------------------------------|----------------------|----------------------|----------------------|----------------------|----------------------|
| <b>CD3+ T cells (%)</b><br>Apheresis product<br>EOP cells               | 45<br>99             | 71.1<br>100          | 3.7<br>100           | 47.9<br>100          | 50<br>100            |
| <b>CD8+ T cells (%)</b><br>Apheresis product<br>EOP cells               | 21.6<br>26           | 24.5<br>30           | 1.4<br>63            | 27.2<br>48.5         | 16.1<br>16.3         |
| <b>Tumor cells (%)</b><br>Bone Marrow<br>Apheresis product<br>EOP cells | N.D.<br>3.1<br>0     | N.D.<br>0.4<br>0.01  | 63<br>91.8<br>0.01   | 70<br>0.88<br>0.04   | 0.14<br>0.08<br>0.02 |
| <b>CD3+/19-28z CAR+ (%)</b>                                             | 8.6                  | 14.2                 | 5                    | 14                   | 11.6                 |
| <b>Average VCN per cell</b>                                             | 0.14                 | 0.2                  | 0.02                 | 0.28                 | 0.16                 |
| <b>Cytotoxicity (25:1*)</b><br>Raji tumor cells                         | 29.2                 | 16.9                 | 7                    | 20.6                 | 1.8                  |
| <b>Fold expansion post-transduction</b><br>(days in culture)            | 49 (d11)             | 254 (d11)            | 75 (d14)             | 143 (d12)            | 15.6 (d7)            |
| <b>Total 1928z+/CD3+ cells infused</b>                                  | 1.8 x10 <sup>8</sup> | 3.2 x10 <sup>8</sup> | 3.2 x10 <sup>8</sup> | 2.9 x10 <sup>8</sup> | 1.4 x10 <sup>8</sup> |
| <b>Total CD3+ cells infused</b>                                         | 2.1 x10 <sup>9</sup> | 2.3 x10 <sup>9</sup> | 6.2 x10 <sup>9</sup> | 2.1 x10 <sup>9</sup> | 1.2 x10 <sup>9</sup> |

**Table S1: Characteristics of infused 19-28z transduced T cells; tumor burden in apheresis and bone marrow.** EOP: end of production cells; N.D.: not detectable in bone marrow aspirate; VCN: vector copy number. \*not corrected for CAR+ T cells; EOP: end of production; the average 19-28z vector copy number per cell was 0.14, 0.2 and 0.02 for MSK-ALL1, MSK-ALL3 and MSK-ALL4 respectively.

| Patient ID       | Adverse Events                        | Grade | Related  |
|------------------|---------------------------------------|-------|----------|
| <b>MSK-ALL01</b> | Neutropenia                           | 4     | Possible |
|                  | Diarrhea                              | 2     | Possible |
|                  | Hypotension                           | 3     | Possible |
| <b>MSK-ALL03</b> | Febrile neutropenia                   | 3     | Unlikely |
|                  | Hypotension                           | 2     | Unlikely |
| <b>MSK-ALL04</b> | Sinus tachycardia                     | 2     | Possible |
|                  | Fatigue (asthenia, lethargy, malaise) | 3     | Possible |
|                  | Febrile neutropenia                   | 3     | Possible |
|                  | Hypotension                           | 3     | Possible |
|                  | Seizure                               | 2     | Possible |
|                  | Urinary Tract Infection               | 2     | Unlikely |
|                  | Fever (in the absence of neutropenia) | 1     | Unlikely |
| <b>MSK-ALL05</b> | Febrile neutropenia                   | 3     | Possible |
|                  | Hypotension                           | 3     | Possible |
|                  | Hypoxia                               | 4     | Possible |
|                  | Altered mental status                 | 4     | Possible |
|                  | Seizure                               | 2     | Possible |
| <b>MSK-ALL06</b> | Fever (in the absence of neutropenia) | 1     | Possible |

**Table S2: Adverse events**

|                    | <b>MSK-ALL01</b> | <b>MSK-ALL03</b> | <b>MSK-ALL04</b> | <b>MSK-ALL05</b> | <b>MSK-ALL06</b> |
|--------------------|------------------|------------------|------------------|------------------|------------------|
| <b>1hour post</b>  | 0.21             | 1.47             |                  |                  | 0.84             |
| <b>1day post</b>   | 1.1              | 0.62             |                  |                  | 0.28             |
| <b>2-3d post</b>   | 0.3              |                  |                  | 8.4              | 0.28             |
| <b>4-5d post</b>   |                  |                  |                  | 52.7             | 0.75             |
| <b>6-8d post</b>   | 4                | 2.2              | 0.8              | 40.1 (14.1)      |                  |
| <b>9-12d post</b>  |                  | 0.12             | (1.6)            | 1.4              |                  |
| <b>13-16d post</b> | 0.03             |                  | 0.04             | 0.65             | 0.05             |
| <b>19-20d post</b> |                  |                  | 0.06             | 0.19             |                  |
| <b>21-23d post</b> | 0.03             | 0.07 (0.07)      | 0.07 (0.01)      |                  | 0.41             |
| <b>26d post</b>    |                  |                  | 0.01             |                  |                  |
| <b>28-30d post</b> |                  | 0.23 (0.45)      |                  |                  | 0.17             |
| <b>33-34d post</b> |                  |                  | 0.05             | 0.04             |                  |
| <b>35-36d post</b> | 0.12             |                  | 0.25             |                  |                  |
| <b>40-41d post</b> |                  |                  | 0.06             | 0.08             |                  |
| <b>42-43d post</b> |                  |                  | 0.11             |                  | 0.16             |
| <b>47d-49 post</b> |                  |                  | 0.1              | 0.21 (0.12)      | 0.21             |
| <b>55d-57 post</b> |                  |                  | (0.05)           |                  | 0.09             |

**Table S3. Percentage of 19-28z CAR+ T cells detected in the CD3+ T cells of the peripheral blood and of the bone marrow (in parenthesis) of patients up to 57 days post-CAR modified T cell therapy.**
